# Supplementary material for: Spatiotemporal Visualization of Insecticides and Fungicides within Fruits and Vegetables Using Gold Nanoparticle-Immersed Paper Imprinting Mass Spectrometry Imaging
Source: MDPI journal article supplement (doi:10.3390/nano11051327), 2021-05-18
Supplement: s1 [file s1]

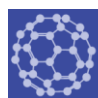

## Article

# Spatiotemporal Visualization of Insecticides and Fungicides within Fruits and Vegetables using Gold Nanoparticle-Immersed Paper Imprinting Mass Spectrometry Imaging

Run Qin <sup>1,†</sup>, Ping Li <sup>1,†</sup>, Mingyi Du <sup>1</sup>, Lianlian Ma <sup>1</sup>, Yudi Huang <sup>1</sup>, Zhibin Yin <sup>2,\*</sup>, Yue Zhang <sup>1</sup>, Dong Chen <sup>1</sup>, Hanhong Xu <sup>1,\*</sup> and Xinzhou Wu <sup>1,\*</sup>

<sup>1</sup> State Key Laboratory for Conservation and Utilization of Subtropical Agro-Bioresources and Key Laboratory of Natural Pesticide and Chemical Biology of the Ministry of Education, South China Agricultural University, Guangzhou 510642, China; qinrun1995@stu.scau.edu.cn (R.Q.); liping08@stu.scau.edu.cn (P.L.); dmy626@stu.scau.edu.cn (M.D.); mll98@stu.scau.edu.cn (L.M.); huangyd@stu.scau.edu.cn (Y.H.); zy3333@stu.scau.edu.cn (Y.Z.); cd2023001@stu.scau.edu.cn (D.C.)

<sup>2</sup> Agro-Biological Gene Research Center, Guangdong Academy of Agricultural Sciences, Guangzhou 510640, China

\* Correspondence: zbyin@agrogene.ac.cn (Z.Y.); hhxu@scau.edu.cn (H.X.); wuxz@scau.edu.cn (X.W.)

† The authors contributed equally to this work.

**Citation:** Qin, R.; Li, P.; Du, M.; Ma, L.; Huang, Y.; Yin, Z.; Zhang, Y.; Chen, D.; Xu, H.; Wu, X.

Spatiotemporal Visualization of Insecticides and Fungicides within Fruits and Vegetables by Gold Nanoparticle-Immersed Paper Imprinting Mass Spectrometry Imaging. *Nanomaterials* **2021**, *11*, 1327. <https://doi.org/10.3390/nano11051327>

Academic Editor: Oscar Ramos; Manuela Pintado; Alessandra Braga Ribeiro; Carla Pereira; Jose M. Lagaron

Received: 25 April 2021

Accepted: 15 May 2021

Published: date

**Publisher's Note:** MDPI stays neutral with regard to jurisdictional claims in published maps and institutional affiliations.

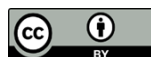

**Copyright:** © 2021 by the authors. Submitted for possible open access publication under the terms and conditions of the Creative Commons Attribution (CC BY) license (<https://creativecommons.org/licenses/by/4.0/>).

## Table of content

**Figure S1.** Schematic diagram of a laser desorption/ionization time-of-flight mass spectrometer.

**Figure S2.** Comparative mass spectra of chlorantraniliprole and azoxystrobin using LDI-MS and AuNP-assisted LDI-MS.

**Figure S3.** Mass spectra of chlorantraniliprole and azoxystrobin deposited on the AuNP-based filter paper.

**Figure S4.** The typical fragmentation pathways of chlorantraniliprole.

**Figure S5.** The typical fragmentation pathways of azoxystrobin.

**Figure S6.** TEM image of the synthesized AuNPs.

**Figure S7.** UV-Vis spectrum of the synthesized AuNPs.

**Figure S8.** HPLC results of chlorantraniliprole concentration in the pericarp, flesh, and entirety of apples at different times after the application of chlorantraniliprole.

**Figure S9.** Optical images of a cucumber slice sprayed with pesticide, and a AuNP-immersed filter paper imprint of a cucumber slice before and after laser irradiance.

**Figure S10.** Optical image and corresponding MS images of a pulp 1 day and 2 days after azoxystrobin spraying.

**Figure S11.** Optical and MS images of an apple slice 0 days and 1 day after azoxystrobin spraying.

**Figure S12.** Optical and MS images of a carrot slice 2 days and 5 day after chlorantraniliprole spraying.

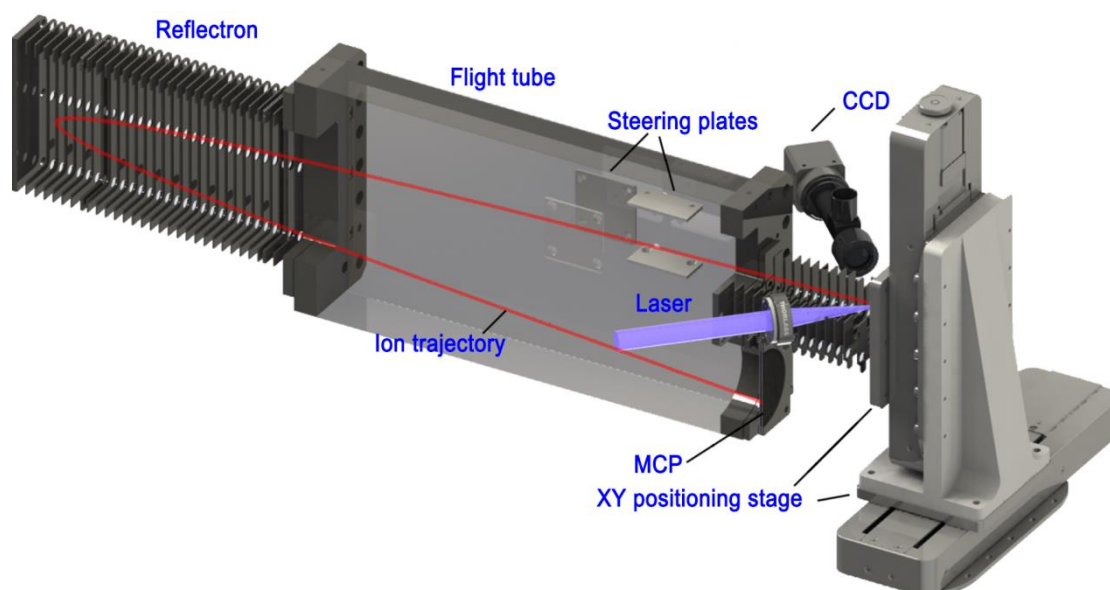

**Figure S1.** Schematic diagram of a laser desorption/ionization time-of-flight mass spectrometer.

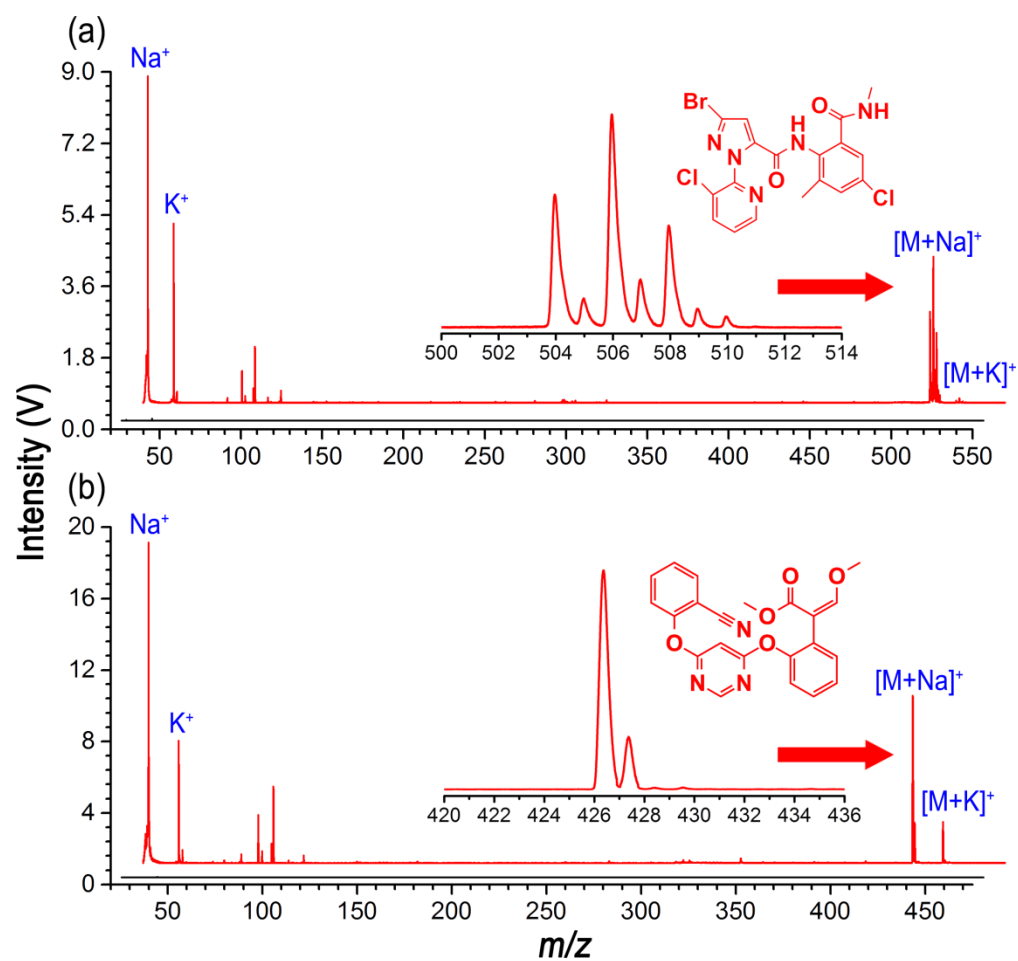

**Figure S2.** Comparative mass spectra of (a) chlorantraniliprole and (b) azoxystrobin using LDI-MS (black line) and AuNP-assisted LDI-MS (purple line). All the spectra were accumulated with 600 laser pulses. The insets indicate the isotope patterns and structures of the corresponding pesticide molecules.

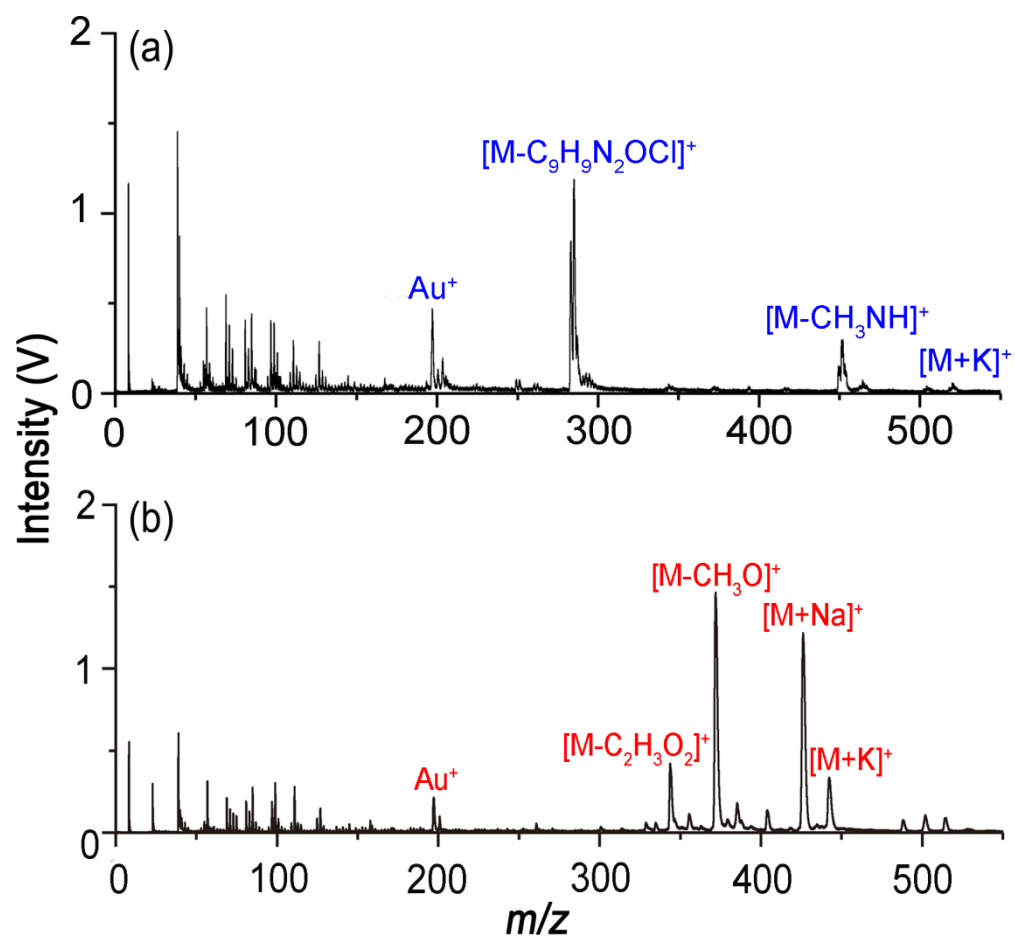

**Figure S3.** Mass spectra of (a) chlorantraniliprole and (b) azoxystrobin deposited on the AuNP-based filter paper. All the spectra were accumulated with 200 laser pulses.

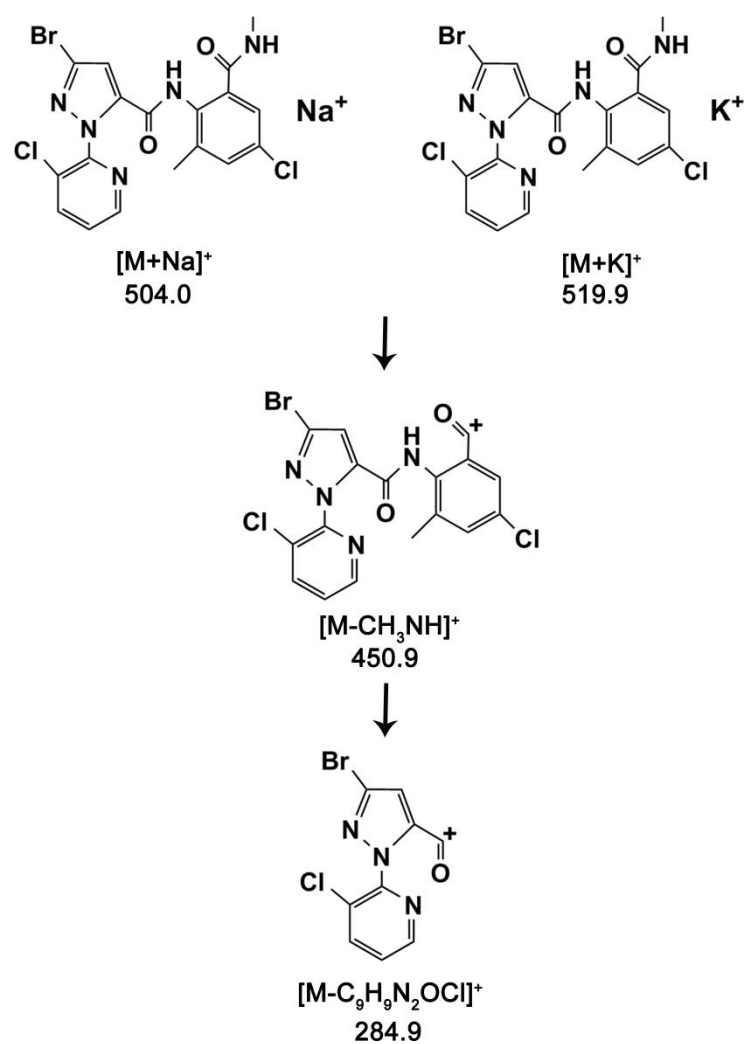

**Figure S4.** The typical fragmentation pathways of chlorantraniliprole for the production of the characteristic fragments, such as  $[M-CH_3NH]^+$  at  $m/z$  450.9 and  $[M-C_9H_9N_2OCl]^+$  at  $m/z$  284.9.

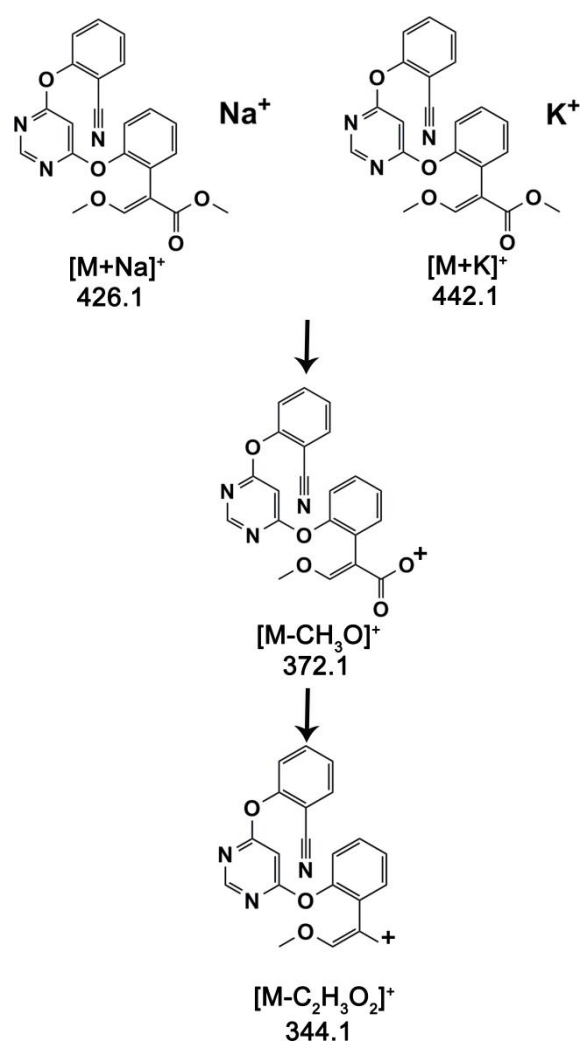

**Figure S5.** The typical fragmentation pathways of azoxystrobin for the production of the characteristic fragments, such as  $[M-CH_3O]^+$  at  $m/z$  372.1 and  $[M-C_2H_5O_2]^+$  at  $m/z$  344.1.

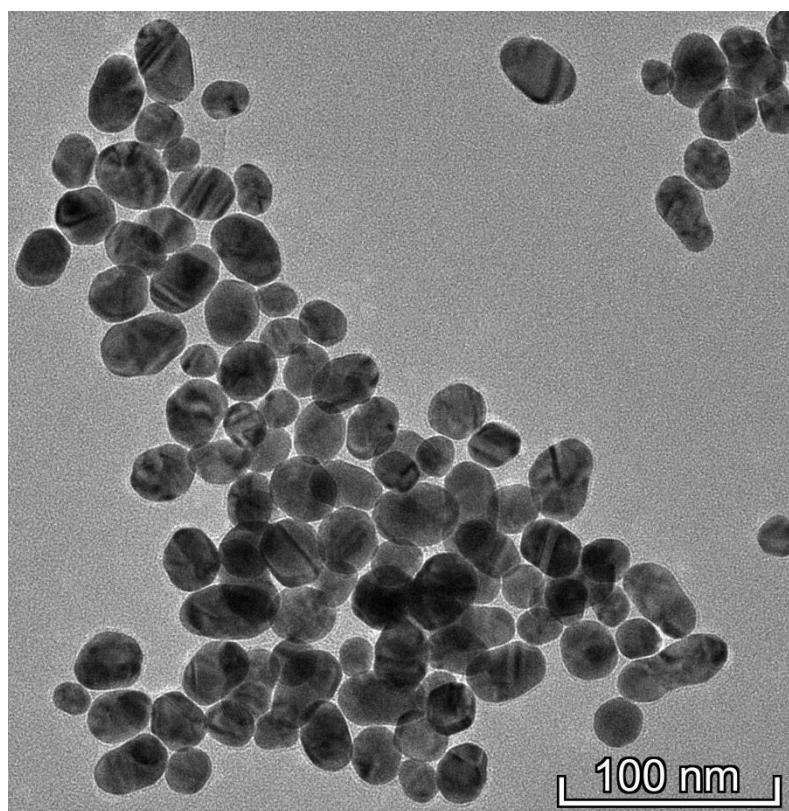

**Figure S6.** TEM image of the synthesized AuNPs.



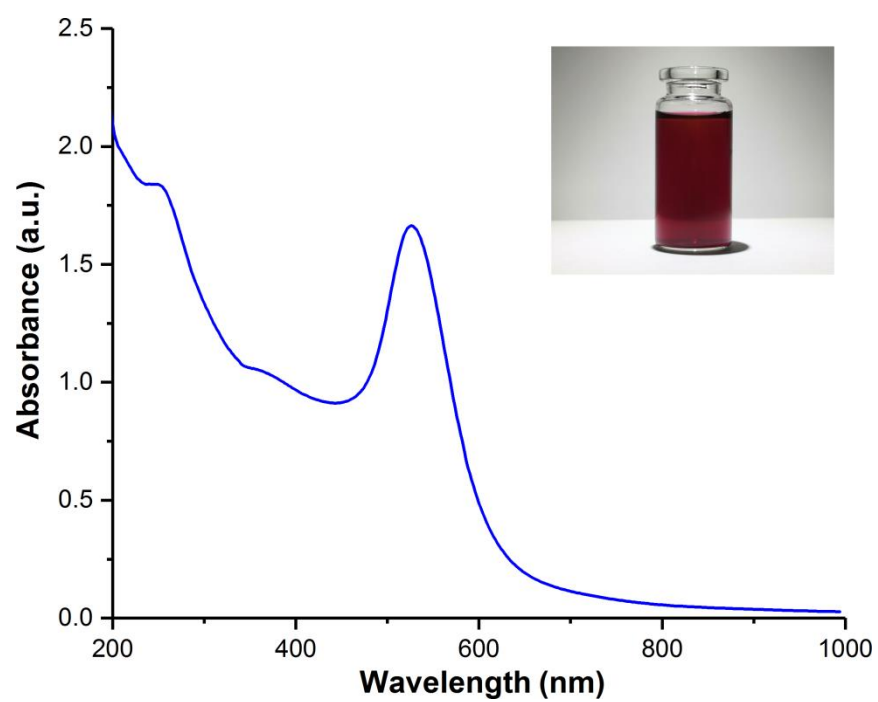

**Figure S7.** UV-Vis spectrum of the synthesized AuNPs.

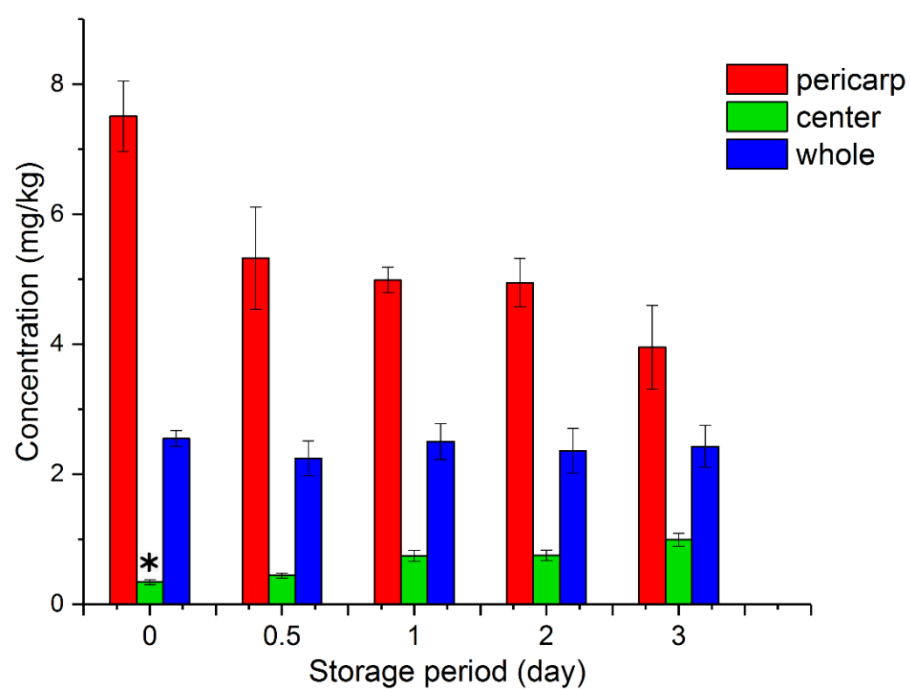

**Figure S8.** HPLC results of chlorantraniliprole concentration in the pericarp, flesh, and entirety of apples at different times after the application of chlorantraniliprole. The footnote (\*) represents the chlorantraniliprole concentration in the center region at day 0 was magnified by 10 times.

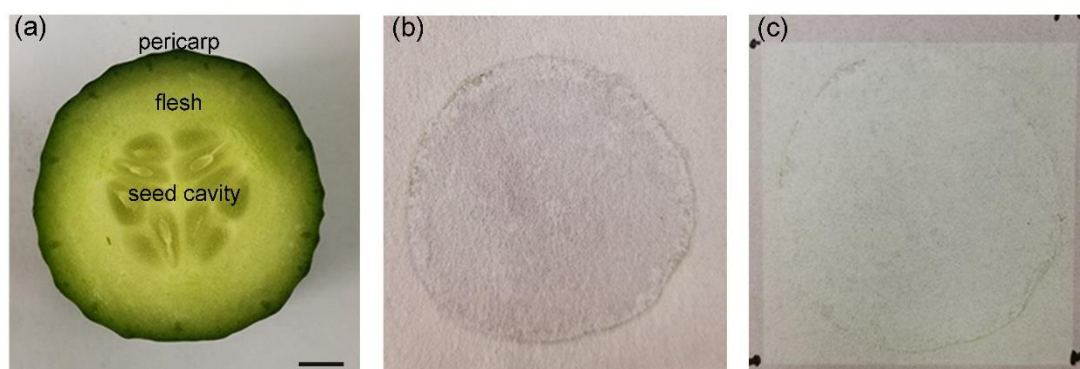

**Figure S9.** Optical images of (a) a cucumber slice sprayed with pesticide, and a AuNP-immersed filter paper imprint of a cucumber slice (b) before and (c) after laser irradiance. Black dots were used to mark the location of the imaging area. Scale bar, 5 mm.

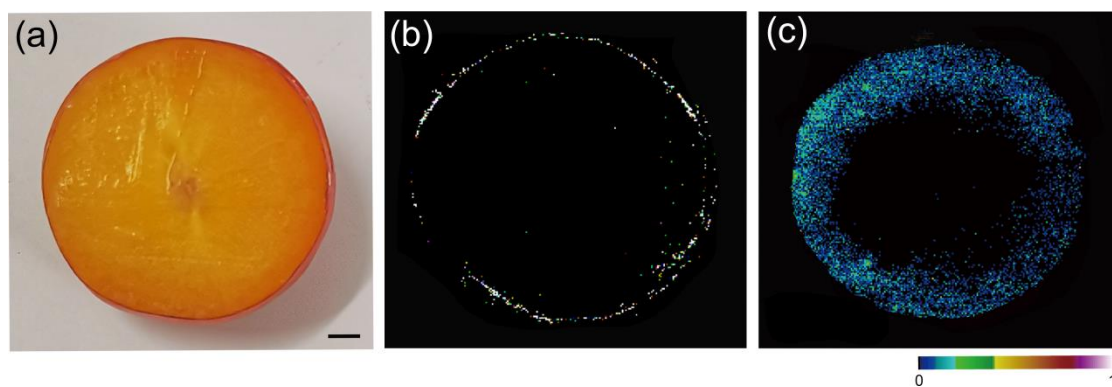

**Figure S10.** (a) Optical and corresponding MS images of a pulp (b) 1 day and (c) 2 days after azoxystrobin spraying. Scale bar, 4 mm.

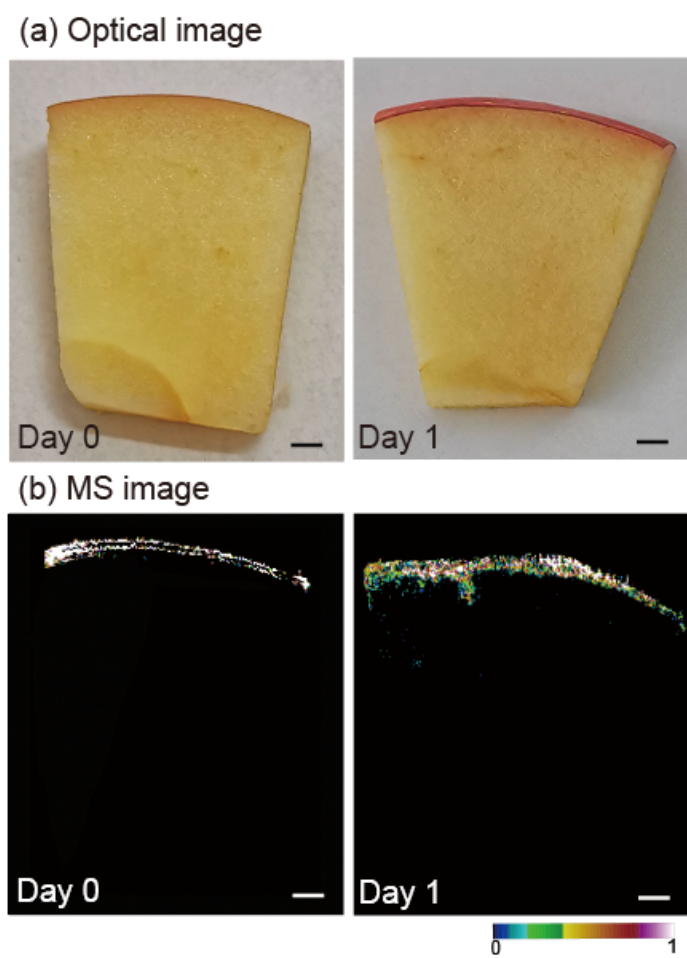

**Figure S11.** (a) Optical and (b) MS images of an apple slice 0 days and 1 day after azoxystrobin spraying. Scale bar, 3 mm.

## (a) Optical image

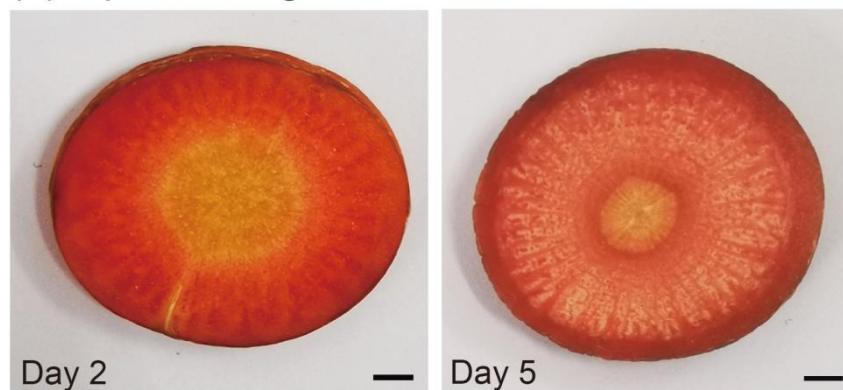

## (b) MS image

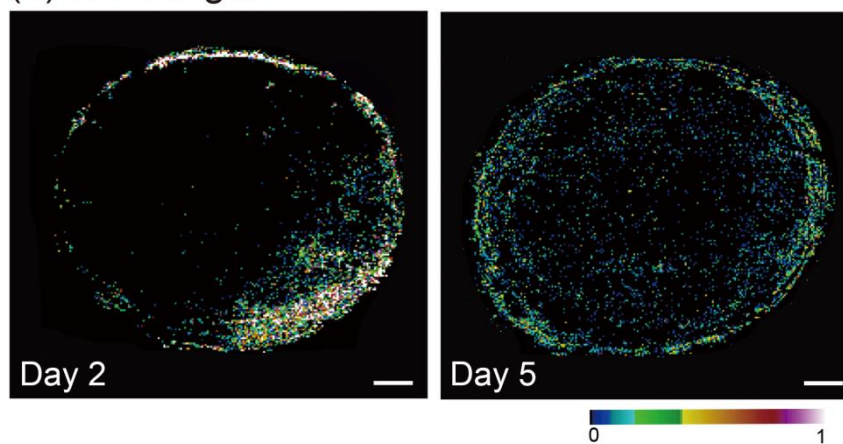

**Figure S12.** (a) Optical and (b) MS images of a carrot slice 2 days and 5 day after chlorantraniliprole spraying. Scale bar, 2 mm.
